# Supplementary material
Source: HighWire-hosted journal article supplement (http://www.qdcxjkg.com/highwire/filestream/113648/field_highwire_adjunct_files/0/Online_supplement.pdf)
Supplement: Online_supplement.pdf [file Online_supplement.pdf]

## ONLINE SUPPLEMENT

### Online Table 1 Characteristics of first admission ECG and serial changes on admission ECGs

| Initial ECG                                                                                                 | N | 242       |
|-------------------------------------------------------------------------------------------------------------|---|-----------|
| Conduction defects                                                                                          |   |           |
| First degree block (63)                                                                                     |   | 1 (0.4%)  |
| Incomplete RBBB (73)                                                                                        |   | 10 (4%)   |
| Complete RBBB (721)                                                                                         |   | 5 (2%)    |
| Incomplete LBBB (76)                                                                                        |   | 8 (3%)    |
| Complete LBBB (711)                                                                                         |   | 4 (2%)    |
| Arrhythmias                                                                                                 |   |           |
| Sinus tachycardia (87)                                                                                      |   | 112 (46%) |
| Premature atrial/junctional beats (811,813)                                                                 |   | 17 (7%)   |
| Premature ventricular beats (812, 813)                                                                      |   | 6 (2%)    |
| Atrial fibrillation (831 or 833)                                                                            |   | 14 (6%)   |
| Wandering atrial pacemaker (814)                                                                            |   | 1 (0.4%)  |
| Other                                                                                                       |   |           |
| P-pulmonale (93)                                                                                            |   | 20 (8%)   |
| Low QRS amplitude (91)                                                                                      |   | 3 (1%)    |
| Q-waves                                                                                                     |   |           |
| Diagnostic Q waves ( 1-1-1 through 1-2-5 plus 1-2-7)                                                        |   | 34 (14%)  |
| Equivocal Q waves ( 1-2-8 in the absence of a 7-1-1 or 7-3 or (any 1-3-))                                   |   | 20 (8%)   |
| ST segment and T waves                                                                                      |   |           |
| ST elevation with T-wave inversion ( 9-2 PLUS (T-wave inversion 5-1 or 5-2 in the absence of 7-2-1 or 7-4)) |   | 2 (0.8%)  |
| ST depression ( 4-1-x or 4-2 or 4-3 in the absence of 7-2-1 or 7-4), or 1-3-x.)                             |   | 32 (13%)  |

|               |                                                                                  |          |
|---------------|----------------------------------------------------------------------------------|----------|
|               | T wave inversion                                                                 | 37 (15%) |
|               | T waves inverted or flat (code 5-1 or 5-2 or 5-3 in the absence of 7-2-1 or 7-4) | 58 (24%) |
|               | ST elevation without T wave inversion (code 9-2)                                 | 7 (3%)   |
|               | Cardiac Injury Infarction Score, mean (SD)                                       | 16 (10)  |
| Serial change | N                                                                                | 203      |
|               | Major Q-waves                                                                    | 3 (1.5%) |
|               | T-wave inversion/flattening                                                      | 65 (32%) |
|               | ST depression                                                                    | 19 (9%)  |
|               | ST elevation                                                                     | 13 (6%)  |
|               | Cardiac Injury Infarction Score, mean (SD)                                       | -1 (9)   |

**Online Table 2 Chest pain and ECG changes in patients with raised troponin**

| Troponin   | Site      | ECG Summary                                       | Chest pain                                                       | ACS |
|------------|-----------|---------------------------------------------------|------------------------------------------------------------------|-----|
| 3x cut-off | Edinburgh | New diagnostic Q waves, and serial T wave changes | Central, sharp                                                   | Yes |
| 3x cut-off | Glasgow   | Serial ST depression                              | Tight, lasting less than 2 min, exertional, radiating to arm/jaw | Yes |
| 3x cut-off | Edinburgh | Serial ST depression                              | None                                                             | No  |
| 3x cut-off | Glasgow   | Diagnostic Q waves and serial T wave changes      | None                                                             | No  |
| 3x cut-off | Monklands | Diagnostic Q waves and serial T wave changes      | None                                                             | No  |
| 3x cut-off | Glasgow   | Serial T wave changes                             | Upper chest pain, worse on movement, relieved partly by oxygen   | Yes |
| 3x cut-off | Monklands | Serial T wave changes                             | None                                                             | Yes |

| Troponin   | Site      | ECG Summary                                           | Chest pain                                         | ACS |
|------------|-----------|-------------------------------------------------------|----------------------------------------------------|-----|
| 3x cut-off | Edinburgh | Diagnostic Q waves, and inverted T waves on first ECG | None                                               | No  |
| 3x cut-off | Ayrshire  | Diagnostic Q waves                                    | Central                                            | No  |
| 3x cut-off | Edinburgh | No ischaemic features                                 | Central, sharp, lasted > 12 hours, exertional      | No  |
| 3x cut-off | Edinburgh | No ischaemic features                                 | None                                               | No  |
| 3x cut-off | Glasgow   | No ischaemic features                                 | Central, tight, exertional                         | No  |
| 3x cut-off | Monklands | No ischaemic features                                 | Central, tight                                     | No  |
| 3x cut-off | Monklands | No ischaemic features                                 | Central, tight, exertional, radiating to arm/jaw   | No  |
| 3x cut-off | Edinburgh | No ischaemic features, no admission ECG               | Sharp, exertional, relieved partly by oxygen       | No  |
| 2x cut-off | Edinburgh | Diagnostic Q waves and serial T wave changes          | Central, lasting less than 2 minutes               | Yes |
| 2x cut-off | Edinburgh | Diagnostic Q waves and serial T wave changes          | Tight, pleuritic                                   | Yes |
| 2x cut-off | Glasgow   | Serial ST elevation, without serial T wave changes    | None                                               | No  |
| 2x cut-off | Glasgow   | Serial T wave changes                                 | None                                               | No  |
| 2x cut-off | Monklands | Diagnostic Q waves                                    | None                                               | No  |
| 2x cut-off | Monklands | No ischaemic features                                 | Central, tight, relieved by bronchodilators/oxygen | No  |
| 2x cut-off | Monklands | No ischaemic features                                 | None                                               | No  |
| 1x cut-off | Edinburgh | Inverted T waves, no repeat ECG                       | None                                               | No  |

|               |         |                       |            |     |
|---------------|---------|-----------------------|------------|-----|
| Troponin      | Site    | ECG Summary           | Chest pain | ACS |
| 1x<br>cut-off | Glasgow | No ischaemic features | Tight      | No  |

Glasgow – Glasgow Royal Infirmary, Edinburgh – Royal Infirmary of Edinburgh, Monklands – Monklands Hospital, Ayrshire – Crosshouse Hospital

**Online Table 3 Comparison of patient characteristics with British Thoracic Society Audit 2008**

|                                  | Case series | BTS Audit |
|----------------------------------|-------------|-----------|
| Age, mean, years                 | 69          | 73        |
| Male sex, %                      | 45%         | 50%       |
| Length stay, median, days        | 5           | 5         |
| Height, median, m                | 1.62        | 1.64      |
| FEV1% predicted, median          | 43%         | 38%       |
| Current smoker, %                | 48%         | 33%       |
| MRC 4-5 prior admission, %       | 65%         | 67%       |
| Systemic steroids within 24h, %  | 90%         | 86%       |
| Antibiotics within 24h, %        | 68%         | 81%       |
| Acidotic on admission, %         | 21%         | 20%       |
| NIV, %                           | 6%          | 11%       |
| Sputum vol increased, %          | 54%         | 66%       |
| Sputum purulence increased, %    | 58%         | 61%       |
| Albumin g/dl, median             | 39          | 39        |
| Creatinine, $\mu$ mol /L, median | 83          | 83        |
| Ischaemic heart disease, %       | 32%         | 25%       |
| Stroke, %                        | 10%         | 6%        |
| Diabetes, %                      | 12%         | 12%       |

**Online Table 4 Comparison of patient characteristics in those meeting and not meeting the Universal definition for Myocardial Infarction**

|                                                        | Do not meet<br>criteria for MI | Meet<br>criteria for<br>MI | P-value |
|--------------------------------------------------------|--------------------------------|----------------------------|---------|
| N                                                      | 222                            | 20                         |         |
| <b>Stable characteristics</b>                          |                                |                            |         |
| Age, years, mean (SD)                                  | 69 (9)                         | 70 (10)                    | 0.62    |
| Male gender, n (%)                                     | 98 (45%)                       | 10 (50%)                   | 0.64    |
| Height, metres, mean (SD)                              | 1.62 (0.10)                    | 1.63 (0.12)                | 0.74    |
| Current smoker, n (%)                                  | 107 (48%)                      | 8 (40%)                    | 0.64    |
| Pack years, median (IQR)                               | 50 (33-65)                     | 47 (35-53)                 |         |
| FEV1, litres, median (IQR)                             | 0.85 (0.68-1.18)               | 1.25 (0.78-1.66)           | 0.09    |
| FVC, litres, median (IQR)                              | 2.04 (1.62-2.54)               | 2.84 (1.67-3.49)           | 0.12    |
| FEV1/FVC ratio, median (IQR)                           | 43 (34-54)                     | 50 (38-55)                 | 0.25    |
| <b>Severity of obstruction by GOLD criteria, n (%)</b> |                                |                            |         |
| Mild                                                   | 8 (5%)                         | 2 (18%)                    | 0.07    |
| Moderate                                               | 56 (32%)                       | 3 (27%)                    |         |
| Severe                                                 | 61 (35%)                       | 4 (36%)                    |         |
| Very severe                                            | 50 (29%)                       | 2 (18%)                    |         |
| Long-term oxygen therapy, n (%)                        | 39 (18)                        | 1 (5%)                     | 0.21    |
| Home nebulisers, n (%)                                 | 109 (49%)                      | 10 (50%)                   | p>0.99  |
| Long-acting beta agonists, n (%)                       | 162 (73%)                      | 10 (50%)                   | 0.04    |
| Long-acting anticholinergics, n (%)                    | 114 (51%)                      | 6 (30%)                    | 0.10    |
| Methylxanthines, n (%)                                 | 27 (12%)                       | 7 (35%)                    | 0.01    |

|                                             |                    |                    |             |
|---------------------------------------------|--------------------|--------------------|-------------|
| Inhaled corticosteroid, n (%)               | 180 (81%)          | 15 (75%)           | 0.55        |
| Long term oral steroids, n (%)              | 6 (3%)             | 0                  | >0.99       |
| <b>Exacerbation characteristics</b>         |                    |                    |             |
| Heart rate, mean (SD)                       | 101 (20)           | 111 (24)           | 0.10        |
| Respiratory rate, mean (SD)                 | 24 (5)             | 25 (5)             | 0.42        |
| BP systolic/diastolic, mean (SD)            | 134 (25) / 72 (15) | 139 (27) / 83 (17) | 0.47 / 0.01 |
| <b>Arterial blood gases, mean (SD)</b>      |                    |                    |             |
| Hydrogen (mmHg)                             | 40 (7)             | 46 (14)            | 0.15        |
| PaO2 (kPa)                                  | 10 (4)             | 14 (7)             | 0.07        |
| PaCO2 (kPa)                                 | 6 (2)              | 7 (3)              | 0.44        |
| <b>Exacerbation (infection) type, n (%)</b> |                    |                    |             |
| Anthonisen type 1                           | 101 (45%)          | 9 (45%)            | 0.47        |
| Anthonisen type 2                           | 49 (22%)           | 2 (10%)            |             |
| Anthonisen type 3                           | 59 (27%)           | 8 (40%)            |             |
| Leukocytosis (WCC >11) x 10 <sup>9</sup> /L | 101 (46%)          | 12 (60%)           | 0.25        |
| Raised C-reactive protein (>6 mg/dl), n (%) | 145 (75%)          | 13 (77%)           | 0.97        |
| Haemoglobin, g/dl, mean (SD)                | 138 (18)           | 138 (23)           | 0.87        |
| Prescribed antibiotics, n (%)               | 152 (68%)          | 12 (60%)           | 0.46        |
| Prescribed oral prednisolone, n (%)         | 198 (89%)          | 19 (95%)           | 0.70        |
| Treated with non-invasive ventilation (NIV) | 13 (6%)            | 2 (10%)            | 0.36        |

**Online Table 5 Acute treatment characteristics of patients by chest pain and meeting Universal definition of MI**

|                                                | Universal definition of MI |          | Chest pain |           |
|------------------------------------------------|----------------------------|----------|------------|-----------|
|                                                | Not met                    | Met      | No         | Yes       |
| Antibiotics                                    | 152 (68%)                  | 12 (60%) | 73 (62%)   | 91 (74%)  |
| Nebulised beta2-agonist                        | 161 (73%)                  | 13 (7%)  | 89 (75%)   | 85 (69%)  |
| Nebulised anticholinergic                      | 139 (63%)                  | 13 (65%) | 78 (66%)   | 74 (60%)  |
| Loop diuretic                                  | 6 (3%)                     | 2 (10%)  | 5 (4%)     | 3 (2%)    |
| Prophylactic dose low molecular weight heparin | 116 (52%)                  | 13 (65%) | 60 (51%)   | 69 (56%)  |
| Oral prednisolone therapy                      | 198 (89%)                  | 19 (95%) | 108 (92%)  | 109 (88%) |
